# Supplementary material
Source: Springer Nature journal article supplement (https://www.springermedizin.de/resource/supplementary/13063_2013_1914_MOESM2_ESM.pdf/9621244)
Supplement: MOESM2 [file 9621244]

428 municipalities in Norway

80 municipalities randomised

Tailored implementation intervention  
40 municipalities

Control (no interventions)  
40 municipalities

Intervention  
October 2013-March 2014

Data collection  
July-October 2014

Data collection  
July-October 2014
